# Supplementary material for: Proteome evolution under non-substitutable resource limitation
Source: Nat Commun. 2018 Nov 7;9:4650. doi: 10.1038/s41467-018-07106-z (PMC6220234; doi:10.1038/s41467-018-07106-z)

A)

## PHOTOSYNTHESIS - ANTENNA PROTEINS

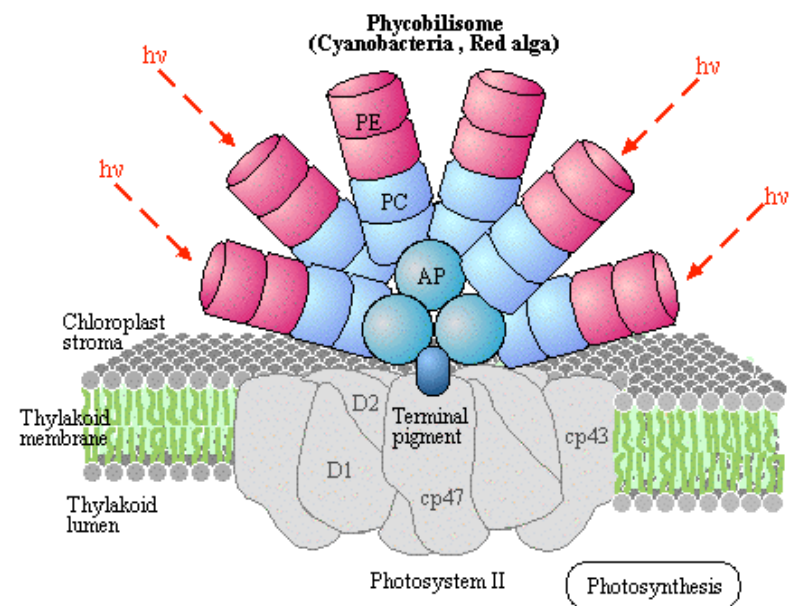

Allophycocyanin(AP)

|      |      |      |      |      |      |
|------|------|------|------|------|------|
| ApcA | ApcB | ApcC | ApcD | ApcE | ApcF |
|------|------|------|------|------|------|

Phycocyanin(PC) / Phycoerythrocyanin(PEC)

|      |      |      |      |      |      |      |
|------|------|------|------|------|------|------|
| CpcA | CpcB | CpcC | CpcD | CpcE | CpcF | CpcG |
|------|------|------|------|------|------|------|

Phycoerythrin(PE)

|      |      |      |      |      |      |      |      |      |      |      |
|------|------|------|------|------|------|------|------|------|------|------|
| CpeA | CpeB | CpeC | CpeD | CpeE | CpeR | CpeS | CpeT | CpeU | CpeY | CpeZ |
|------|------|------|------|------|------|------|------|------|------|------|

Data on KEGG graph  
Rendered by Pathview

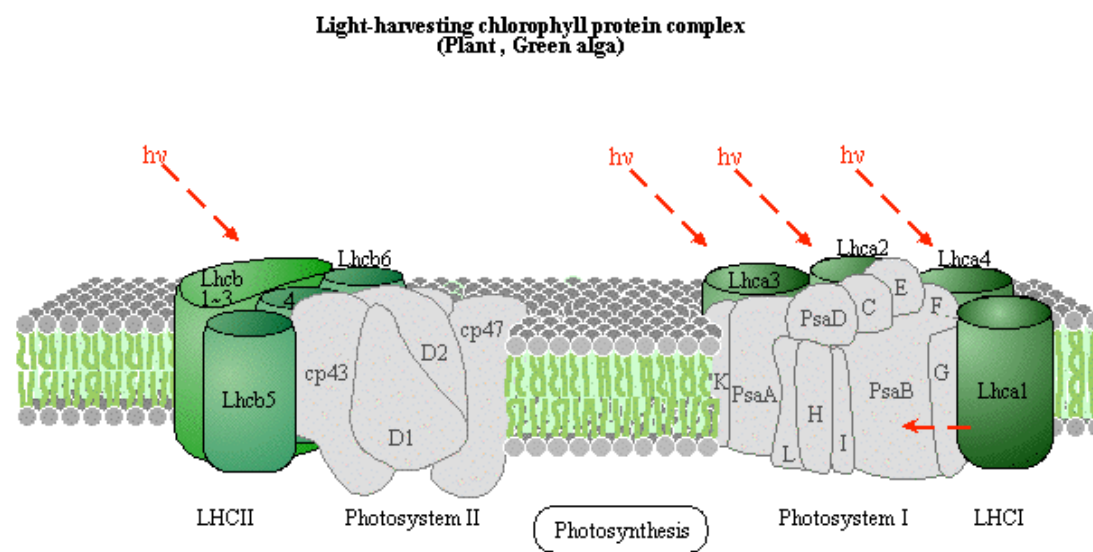

Light-harvesting chlorophyll protein complex(LHC)

|       |       |       |       |       |
|-------|-------|-------|-------|-------|
| Lhca1 | Lhca2 | Lhca3 | Lhca4 | Lhca5 |
|-------|-------|-------|-------|-------|

|       |       |       |       |       |       |       |
|-------|-------|-------|-------|-------|-------|-------|
| Lhcb1 | Lhcb2 | Lhcb3 | Lhcb4 | Lhcb5 | Lhcb6 | Lhcb7 |
|-------|-------|-------|-------|-------|-------|-------|

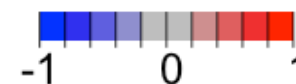

B)

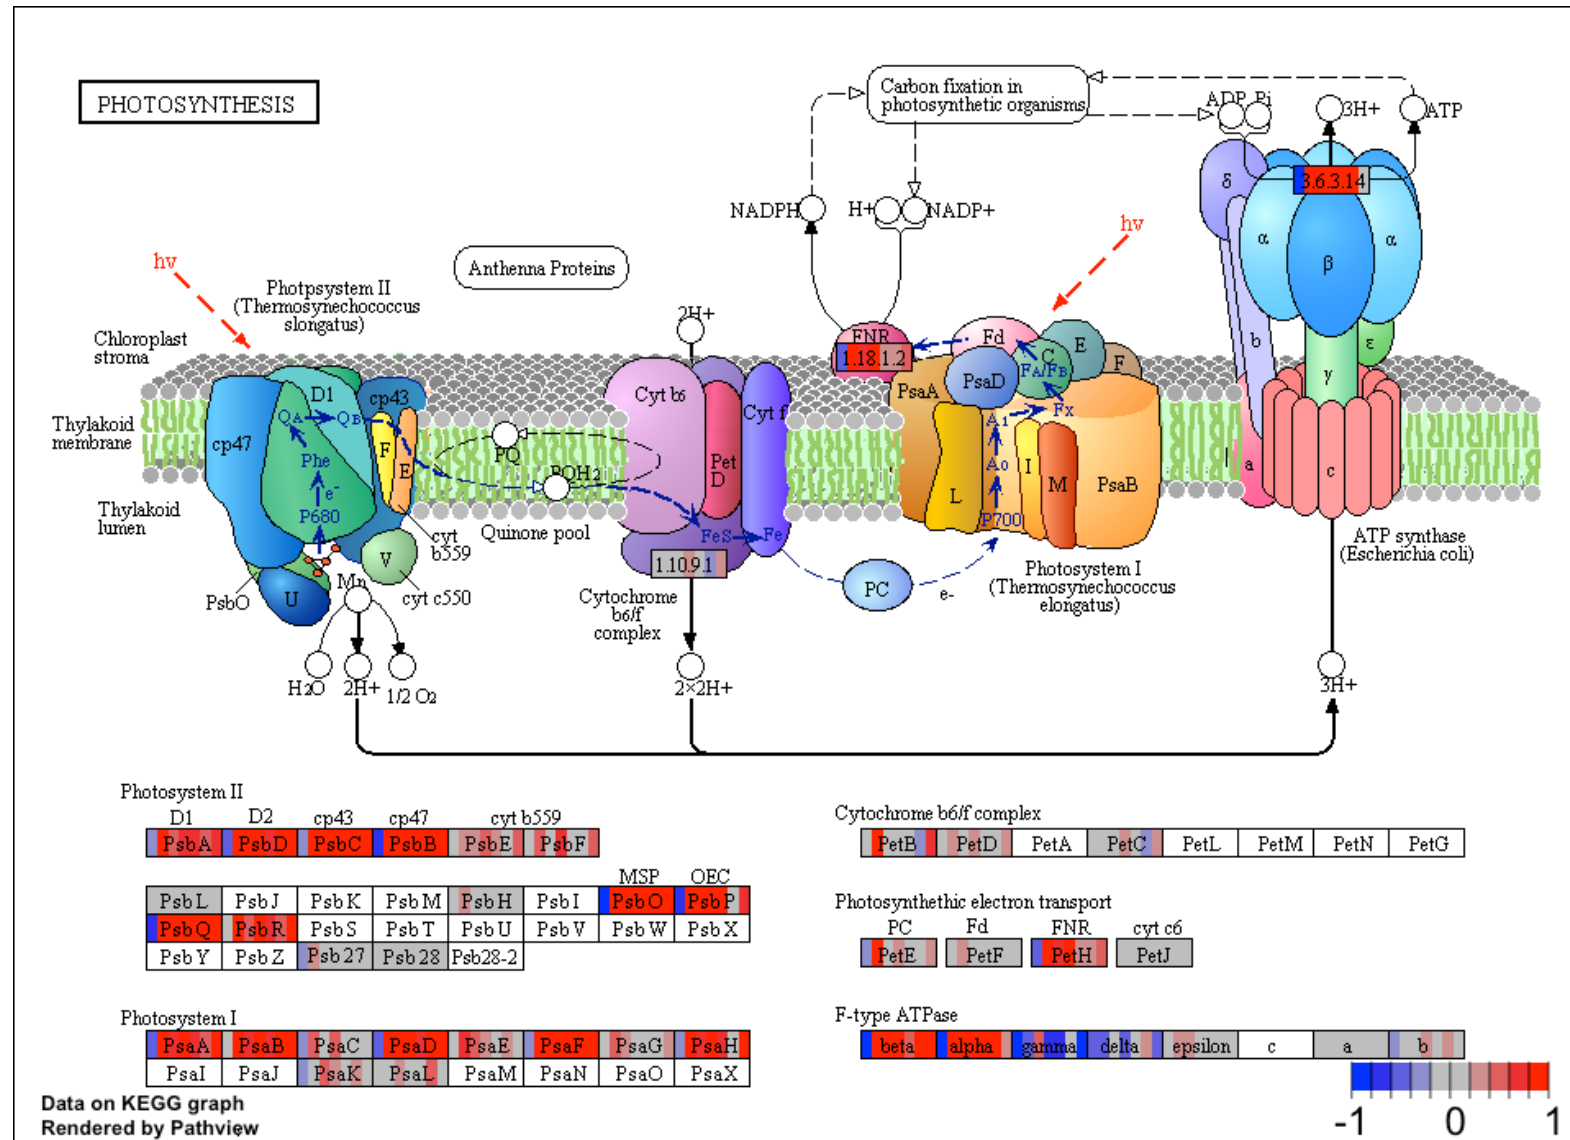

c)

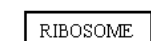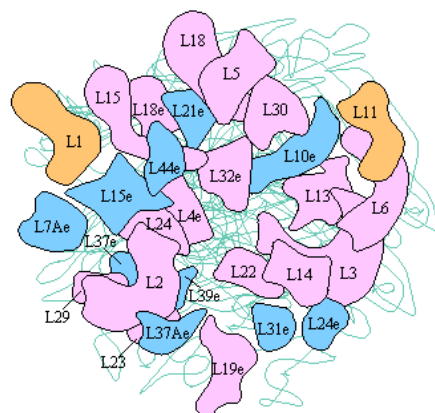Large subunit (*Haloarcula marismortui*)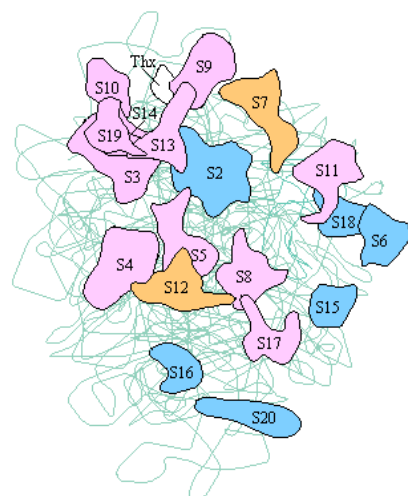Small subunit (*Thermus aquaticus*)

Data on KEGG graph  
Rendered by Pathview

### Ribosomal RNAs

|                    |     |    |      |     |
|--------------------|-----|----|------|-----|
| Bacteria / Archaea | 23S | 5S |      | 16S |
| Eukaryotes         | 25S | 5S | 5.8S | 18S |

### Ribosomal proteins

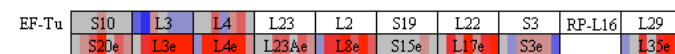L7/L12  
stalk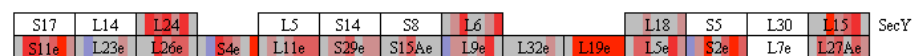 SecY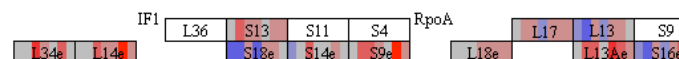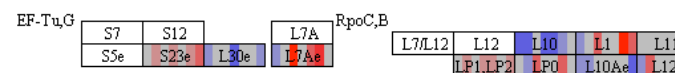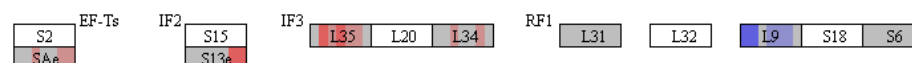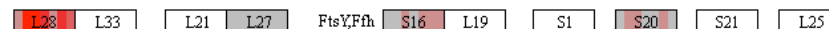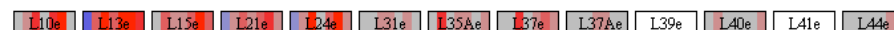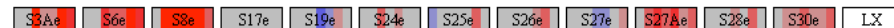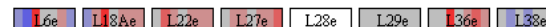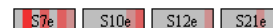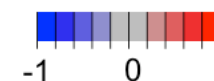

D)

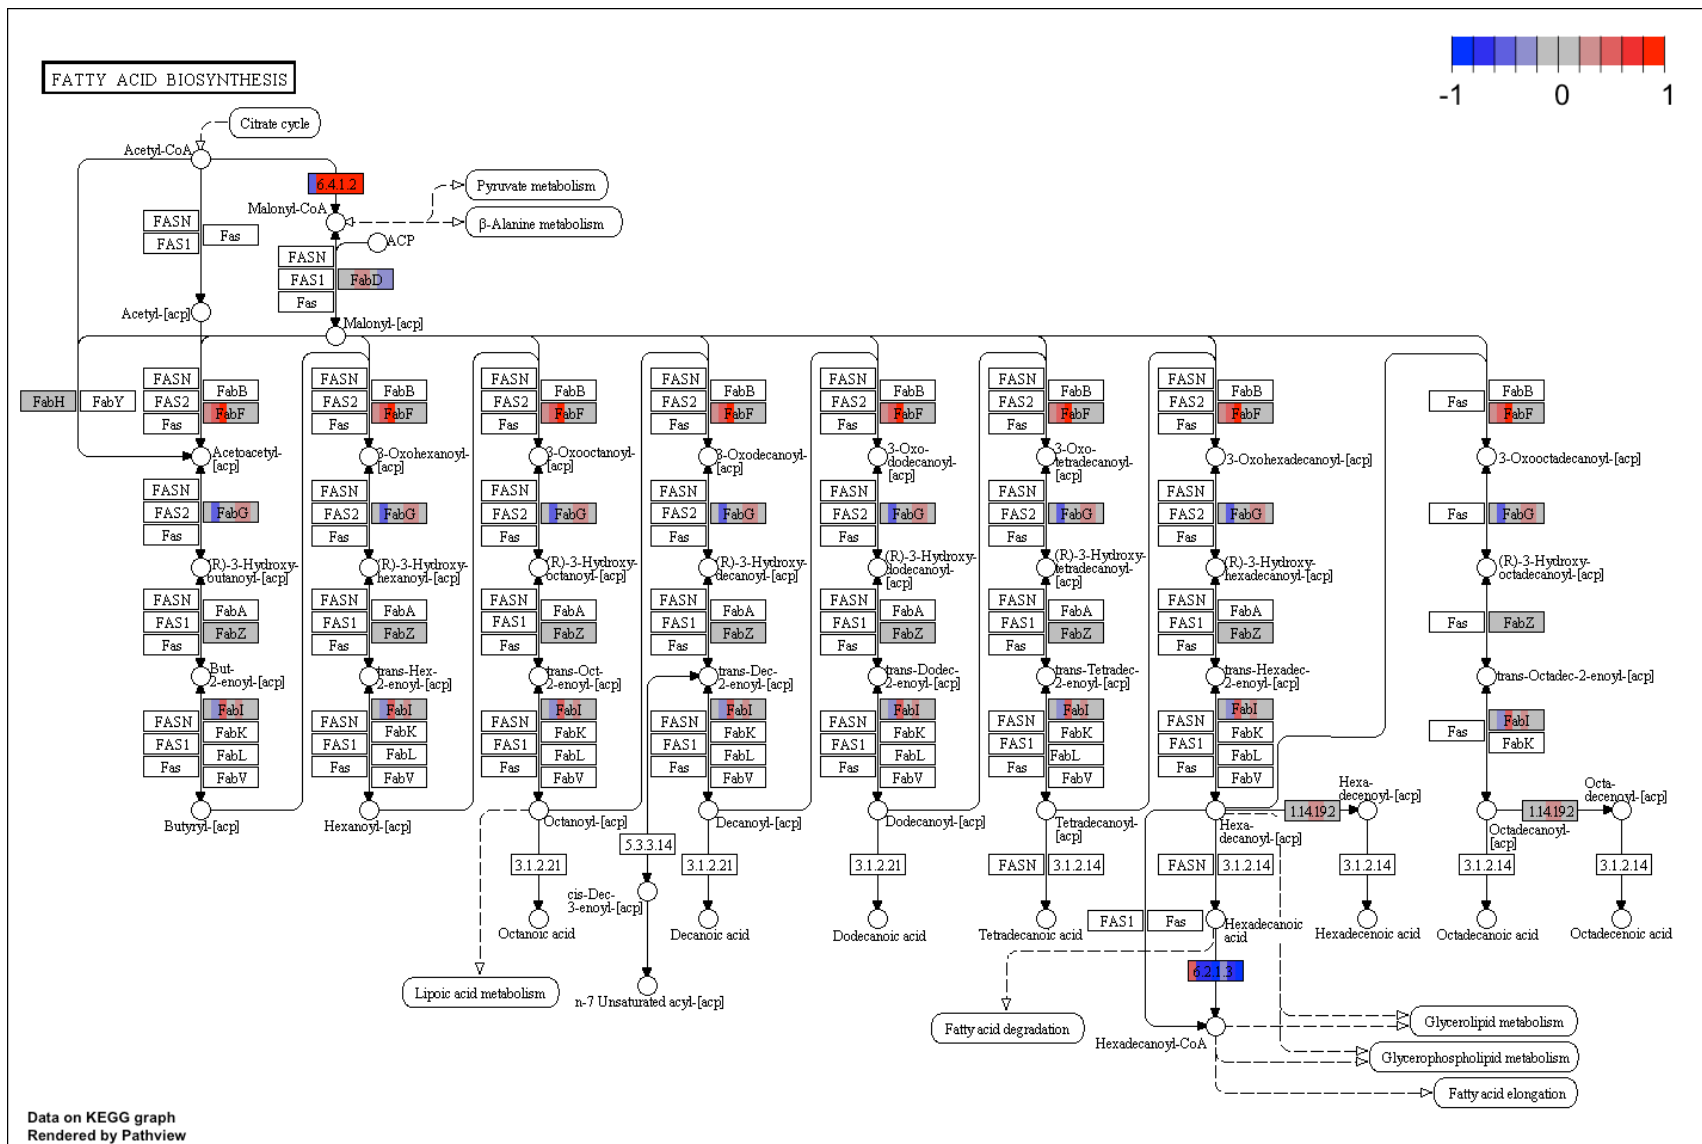

E)

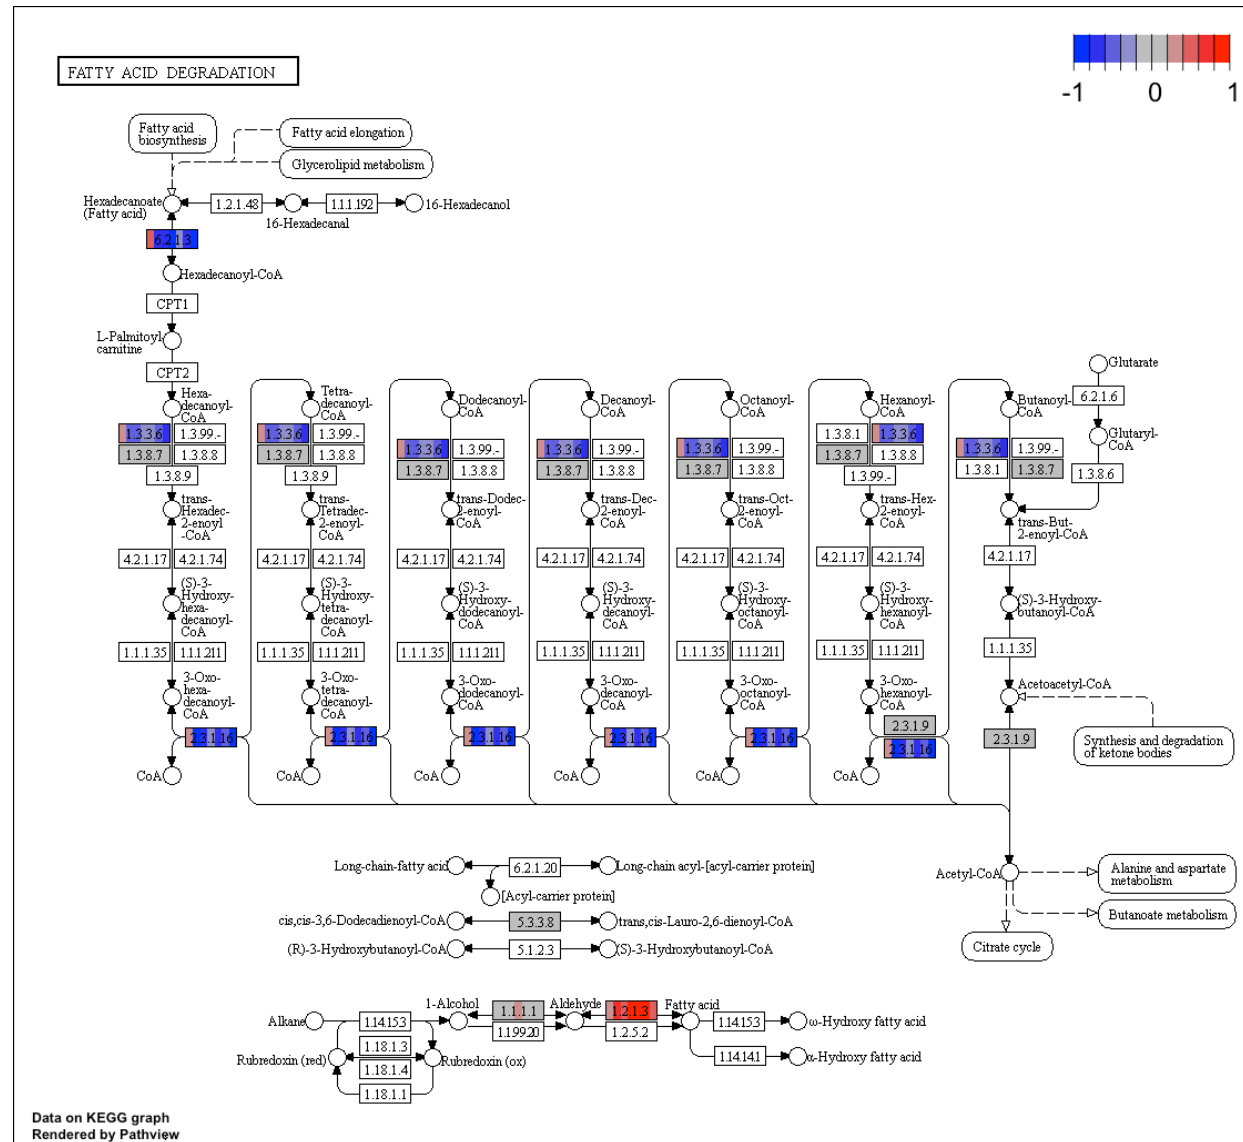

F)

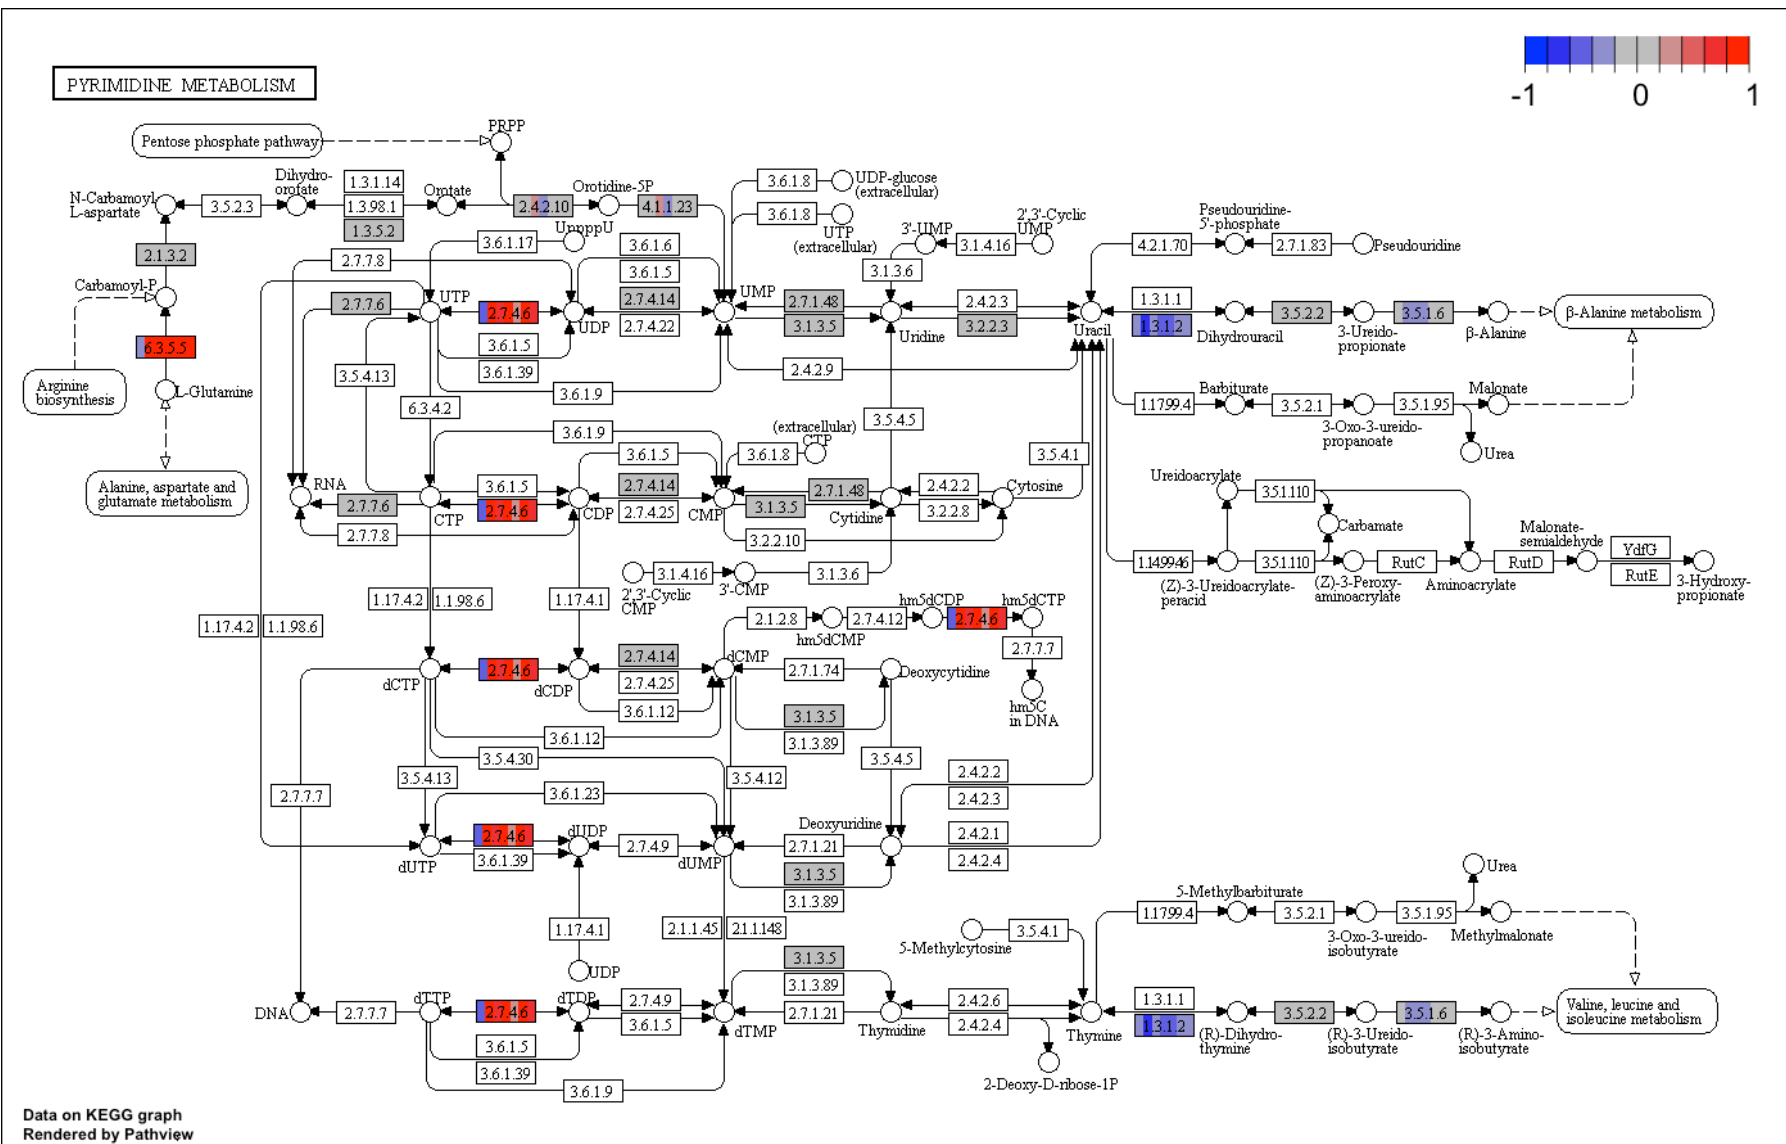

G)

## PURINE METABOLISM

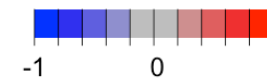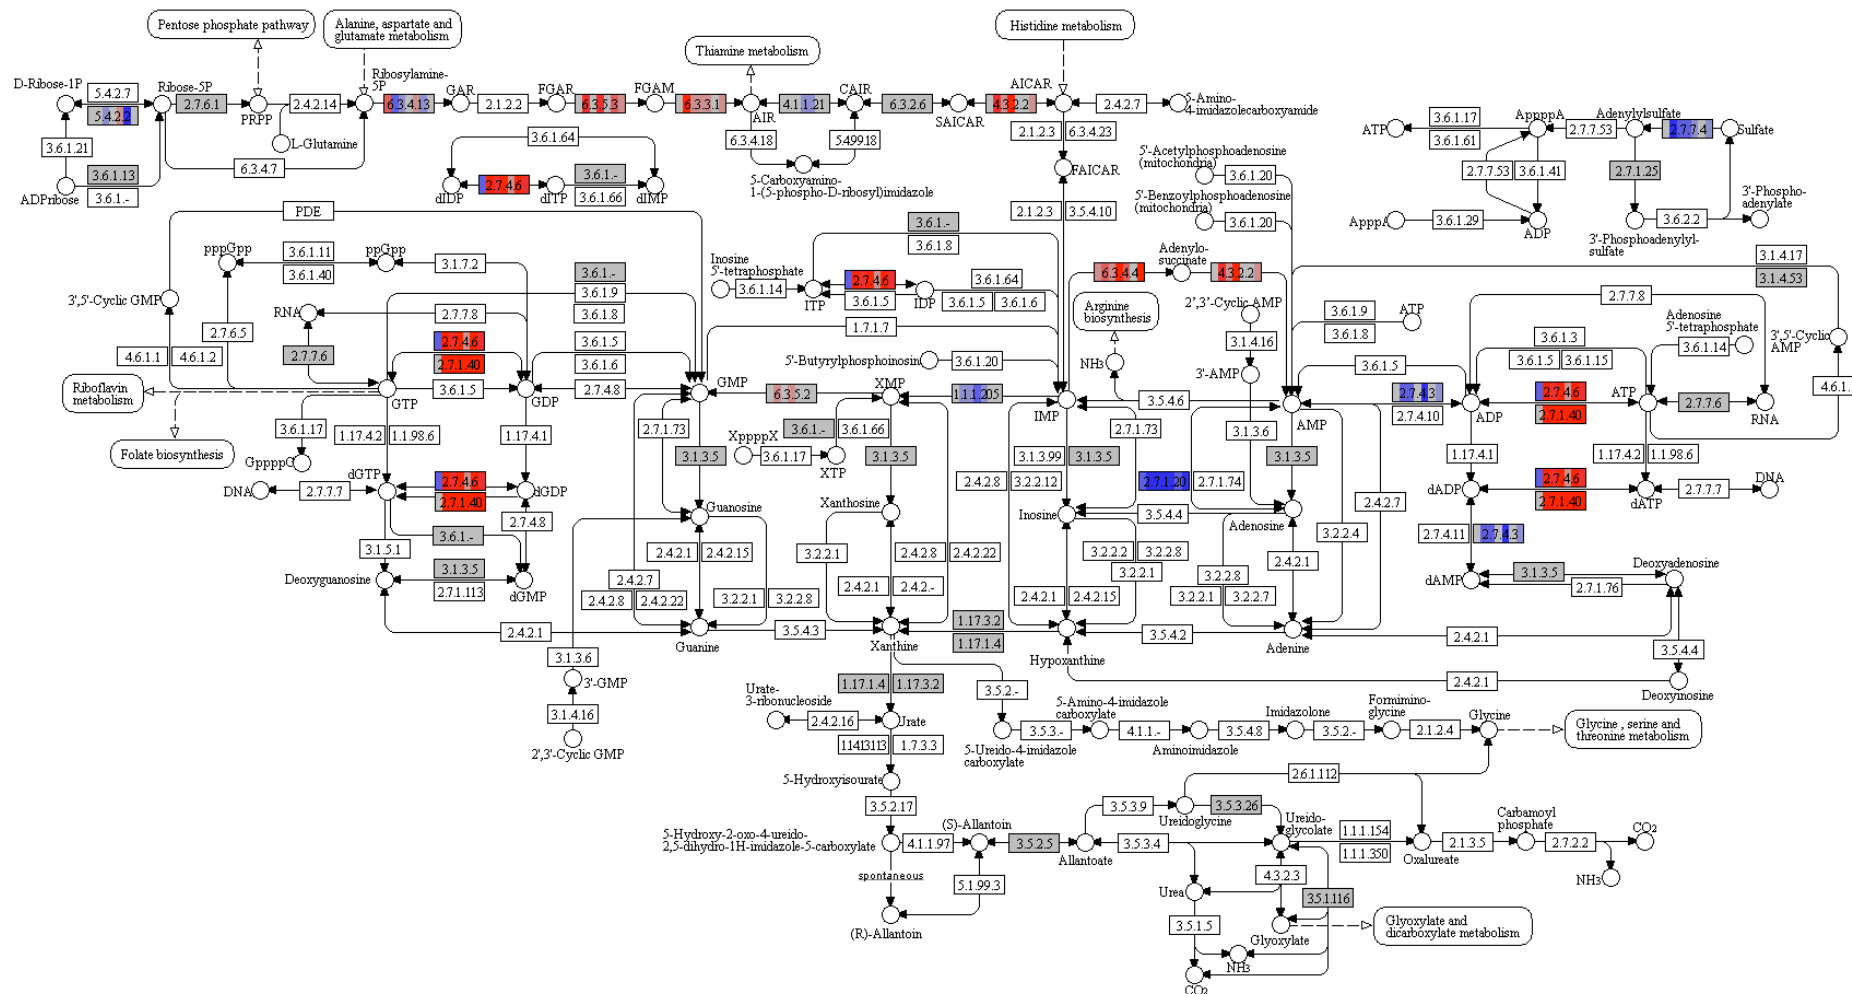

Data on KEGG graph  
Rendered by Pathview

H)

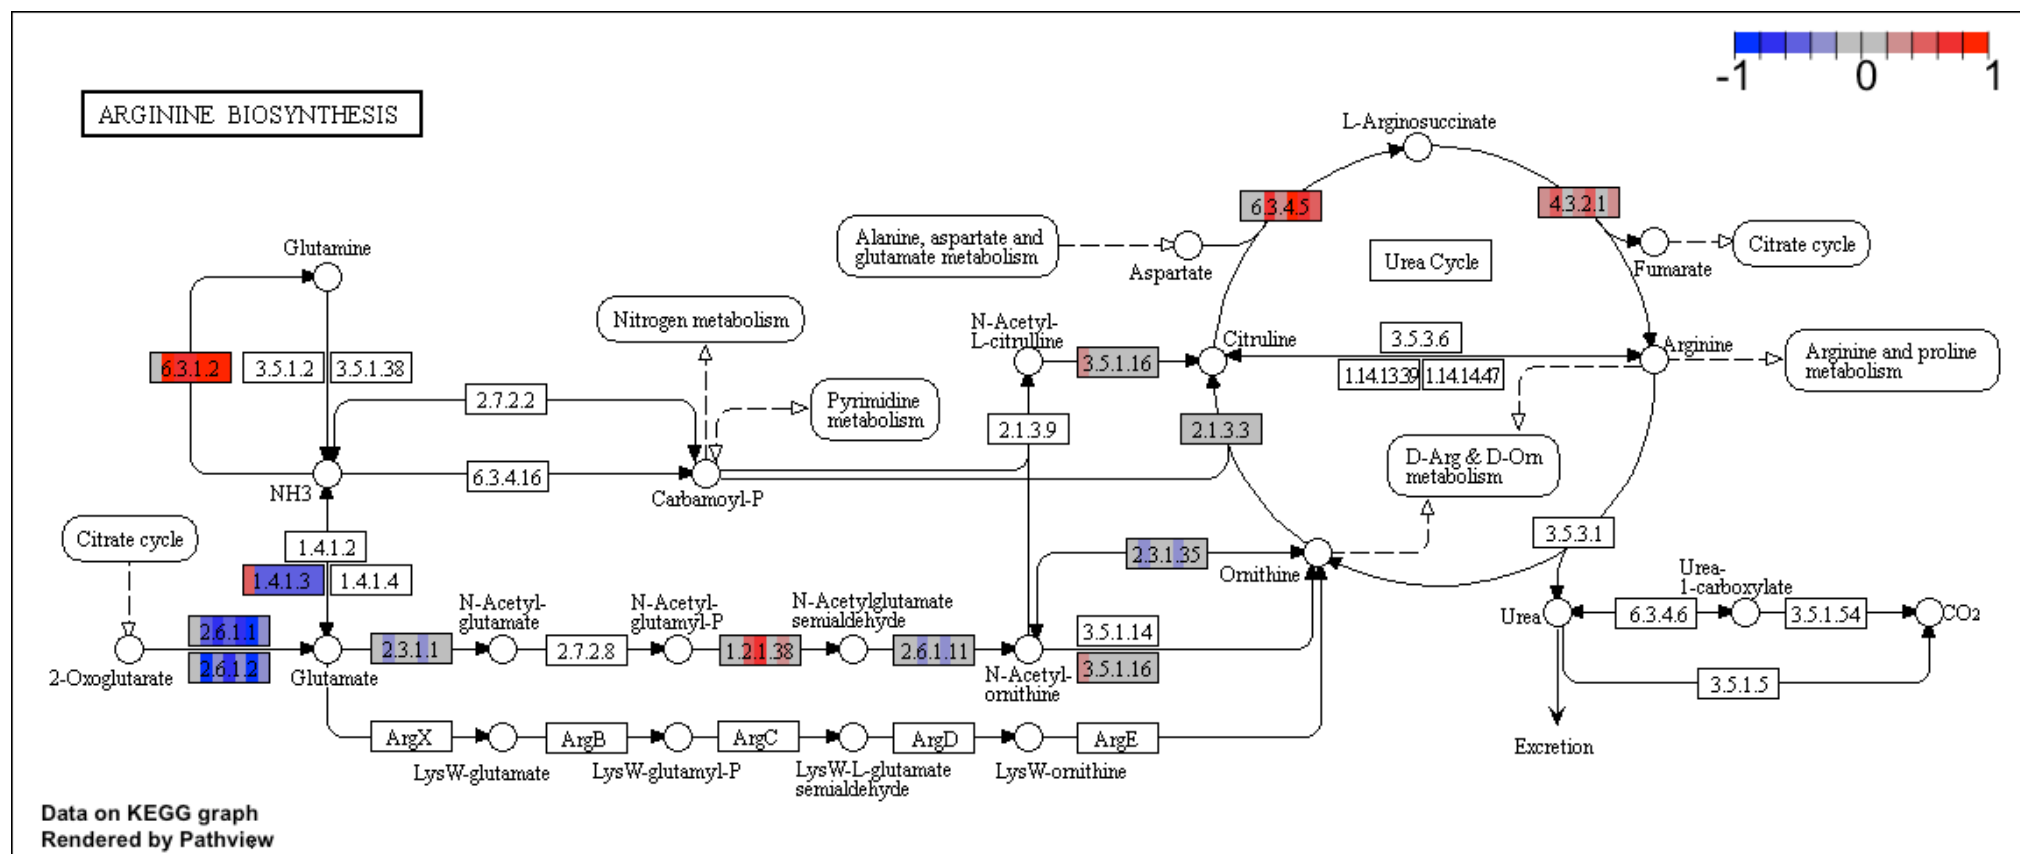

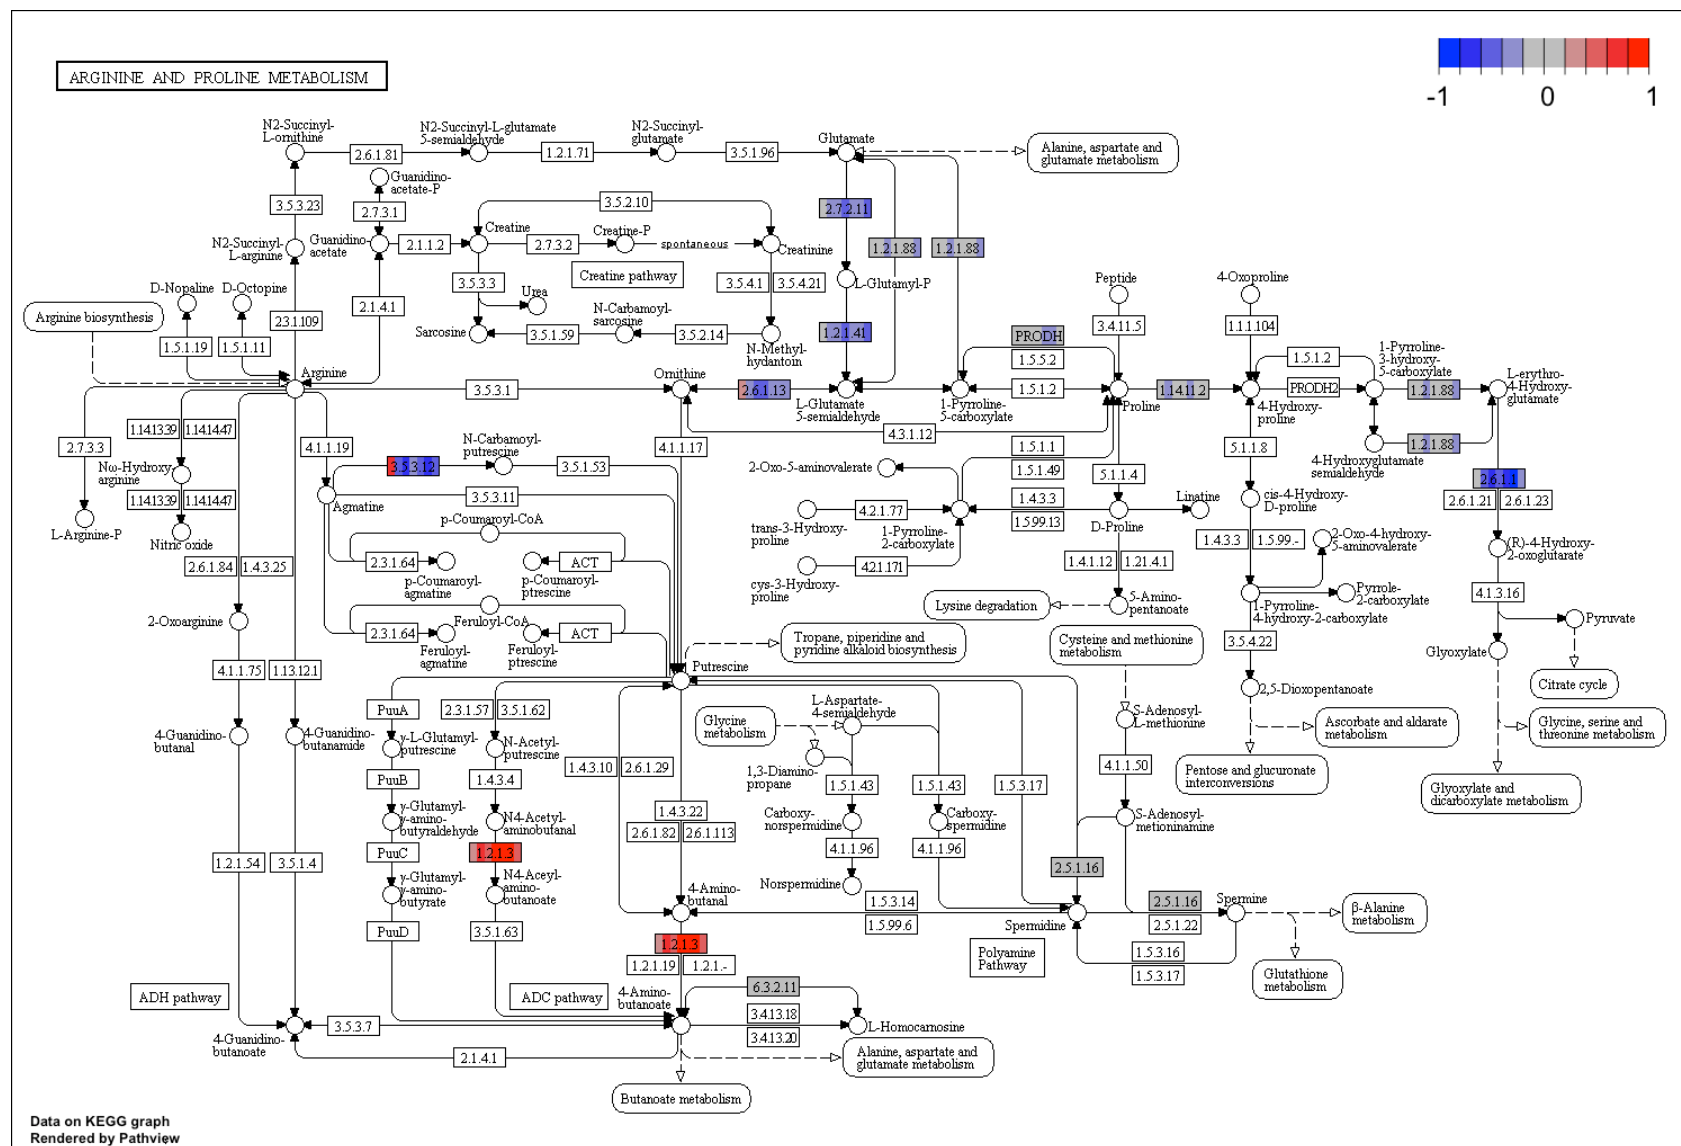

J)

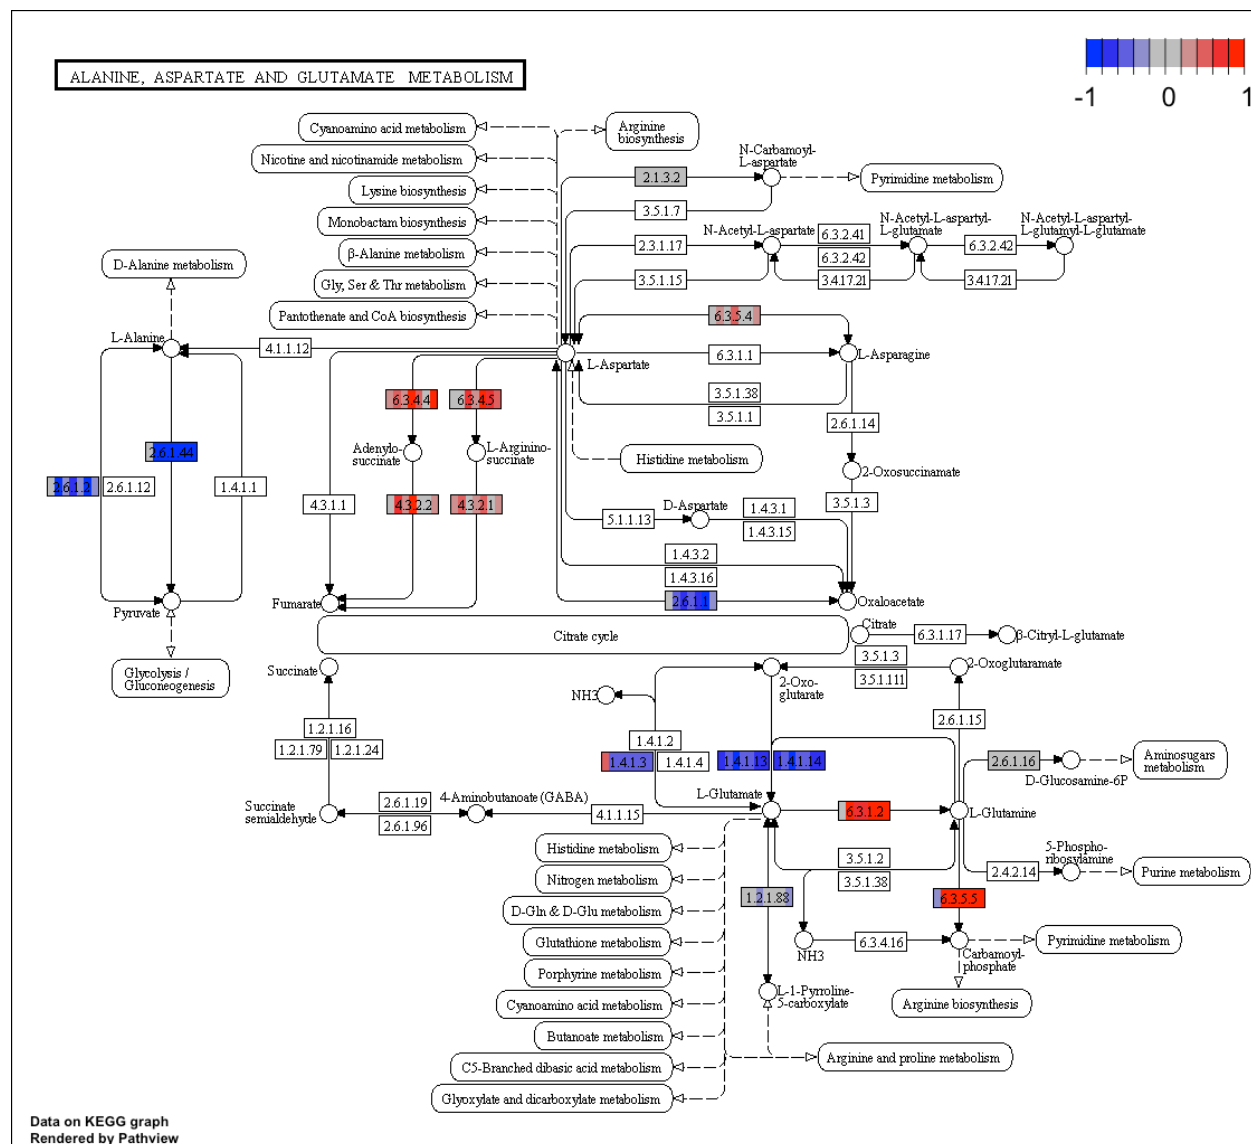

K)

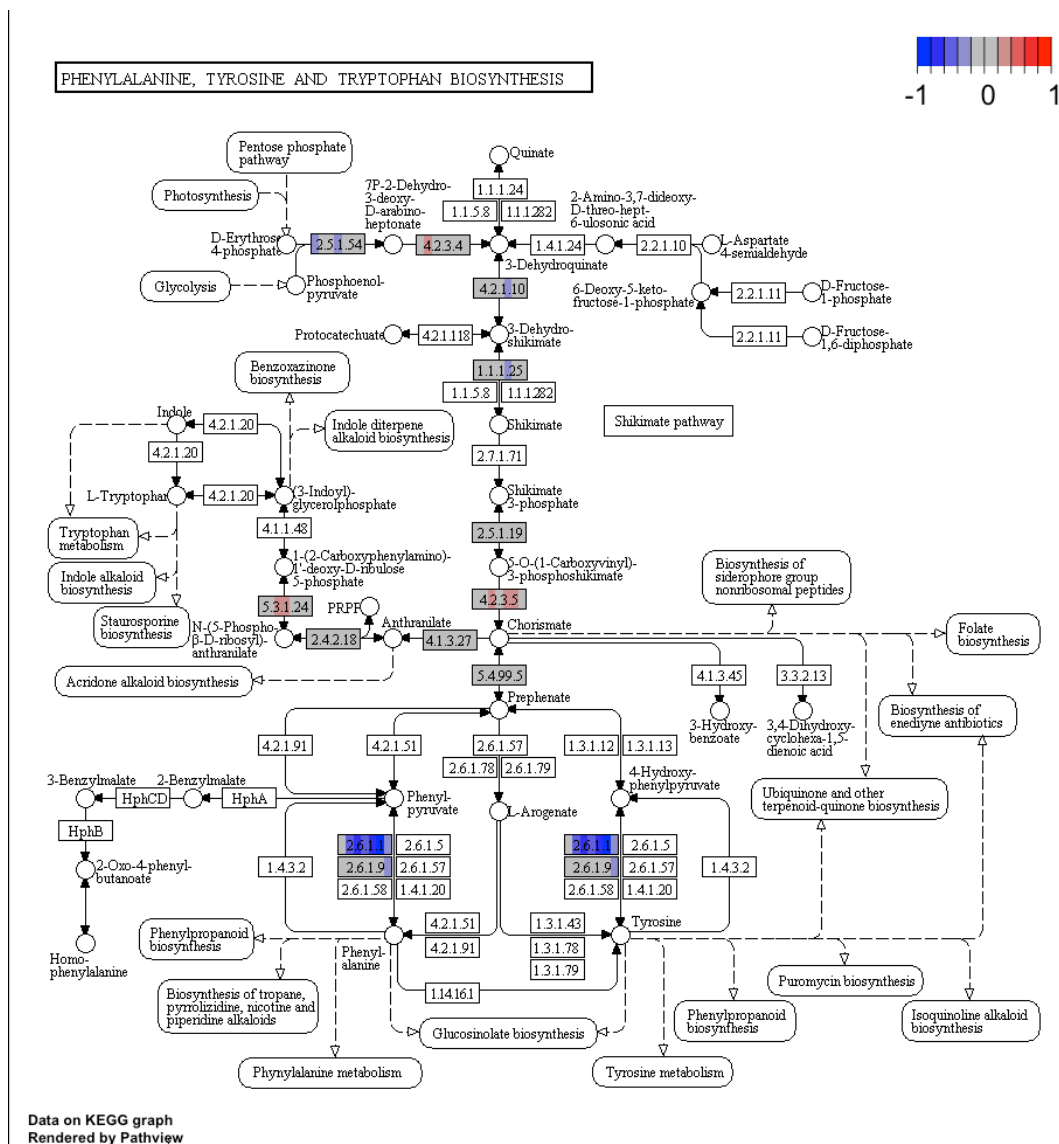

L)

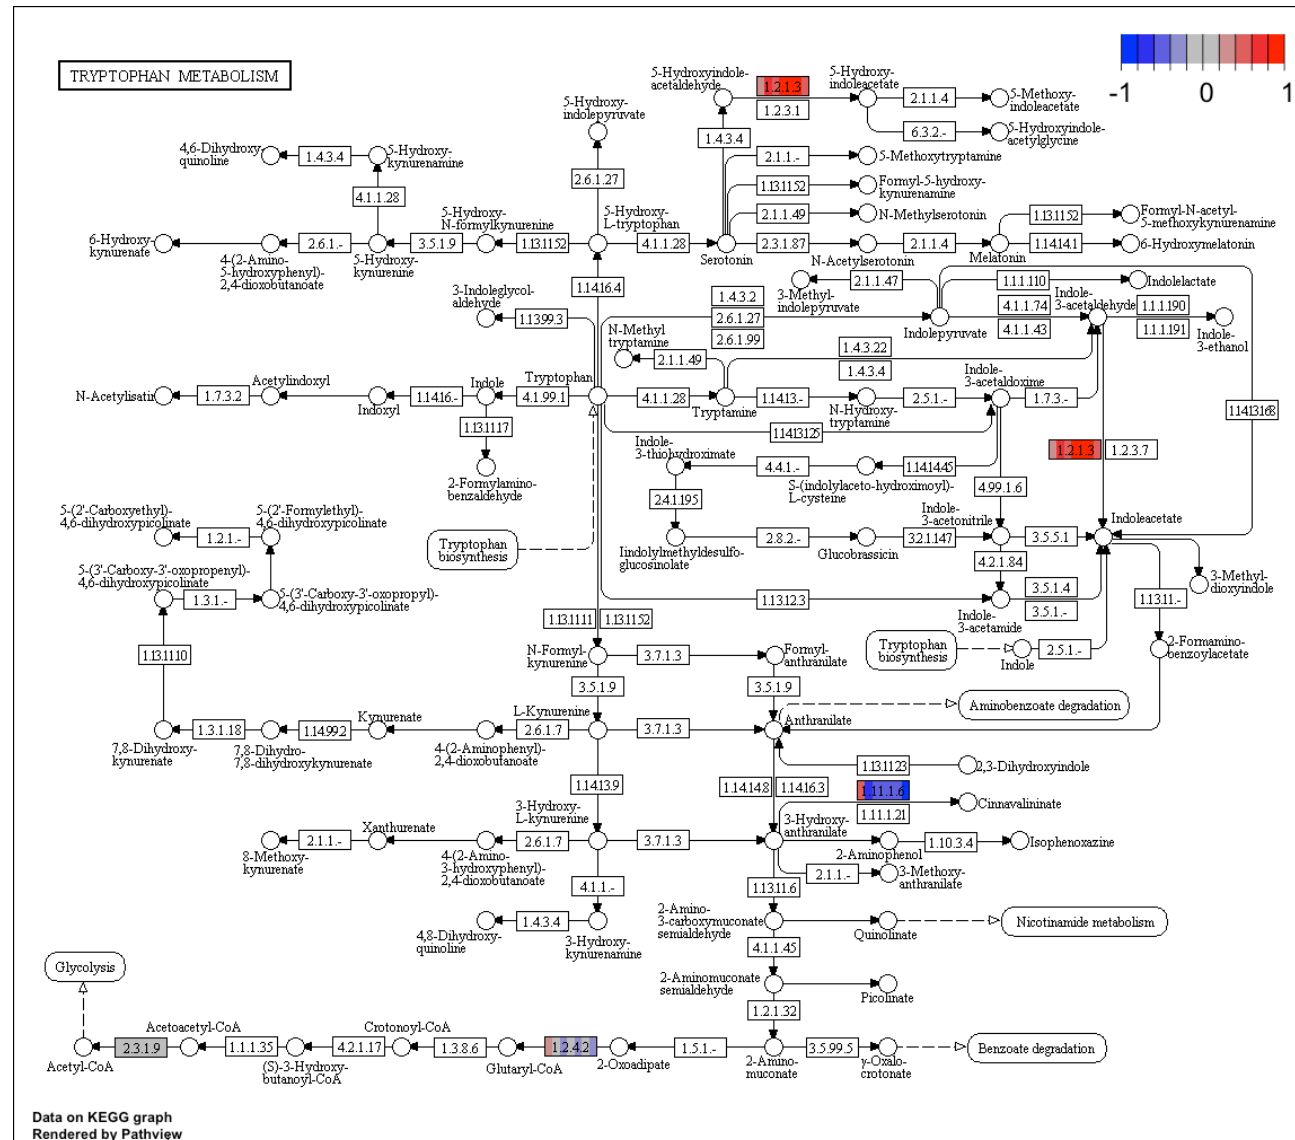

M)

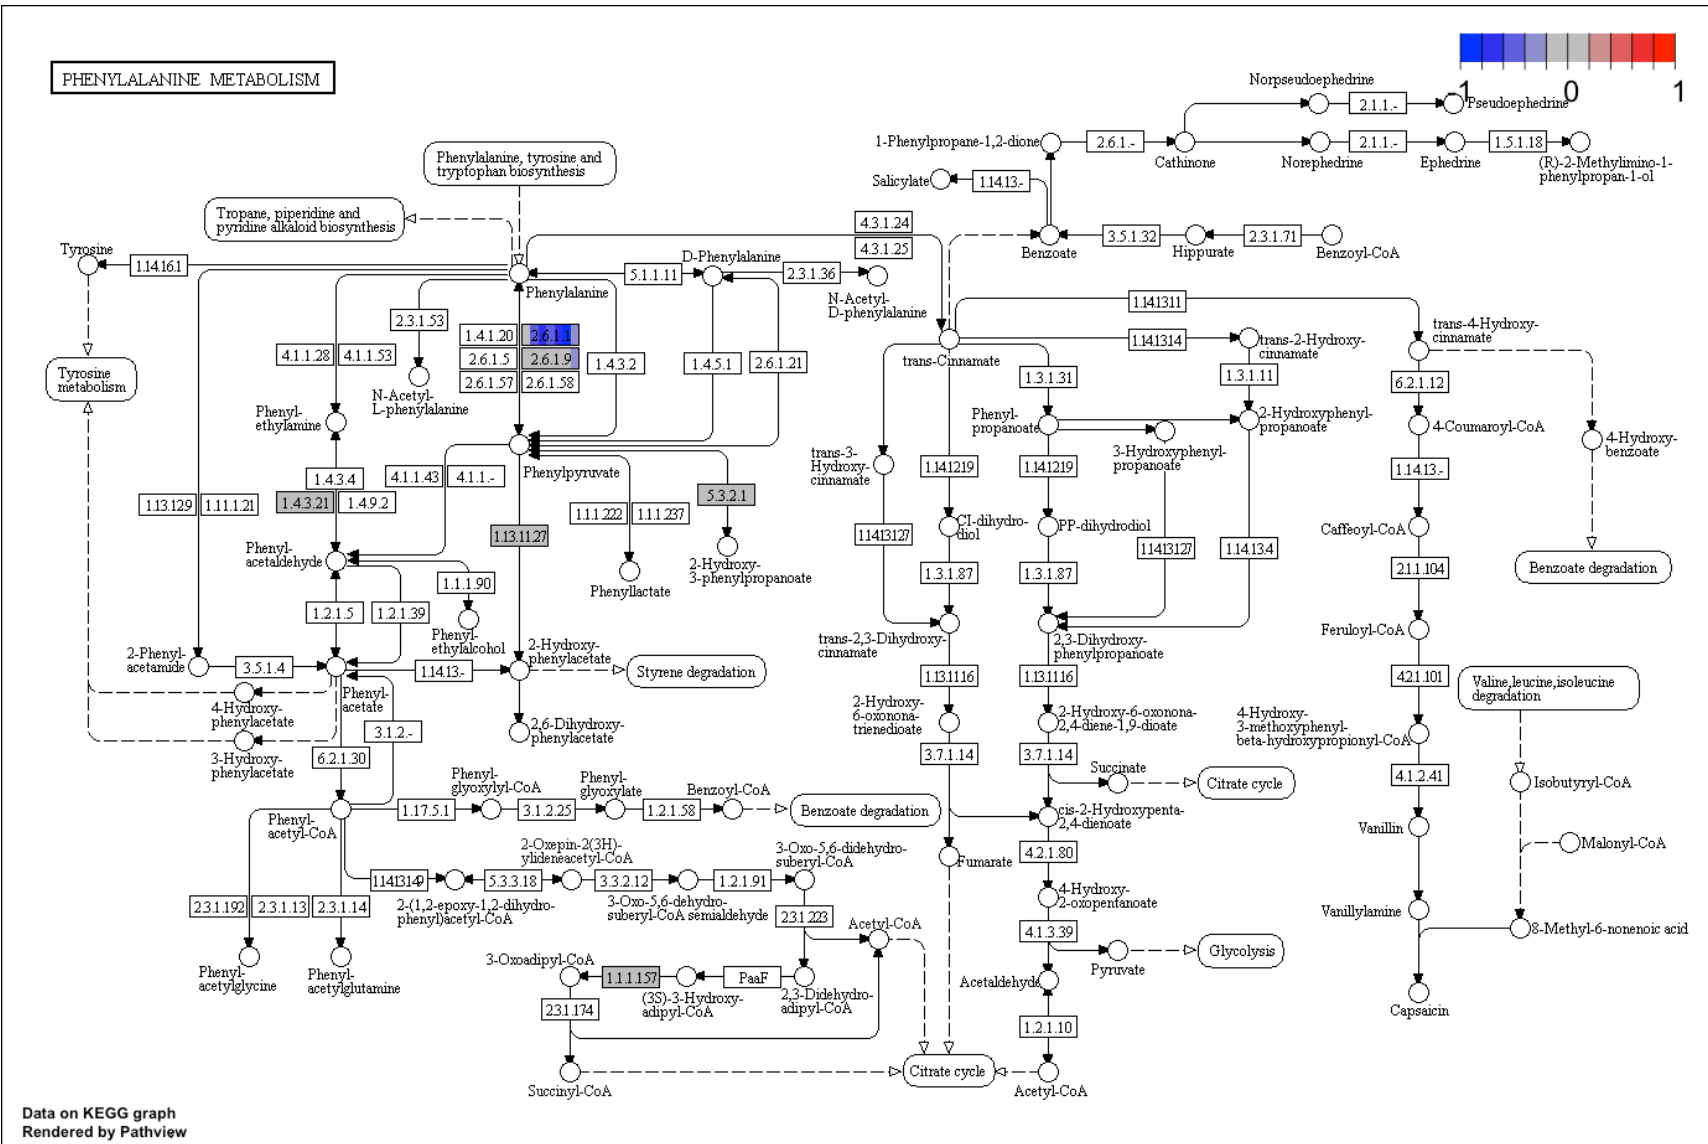

N)

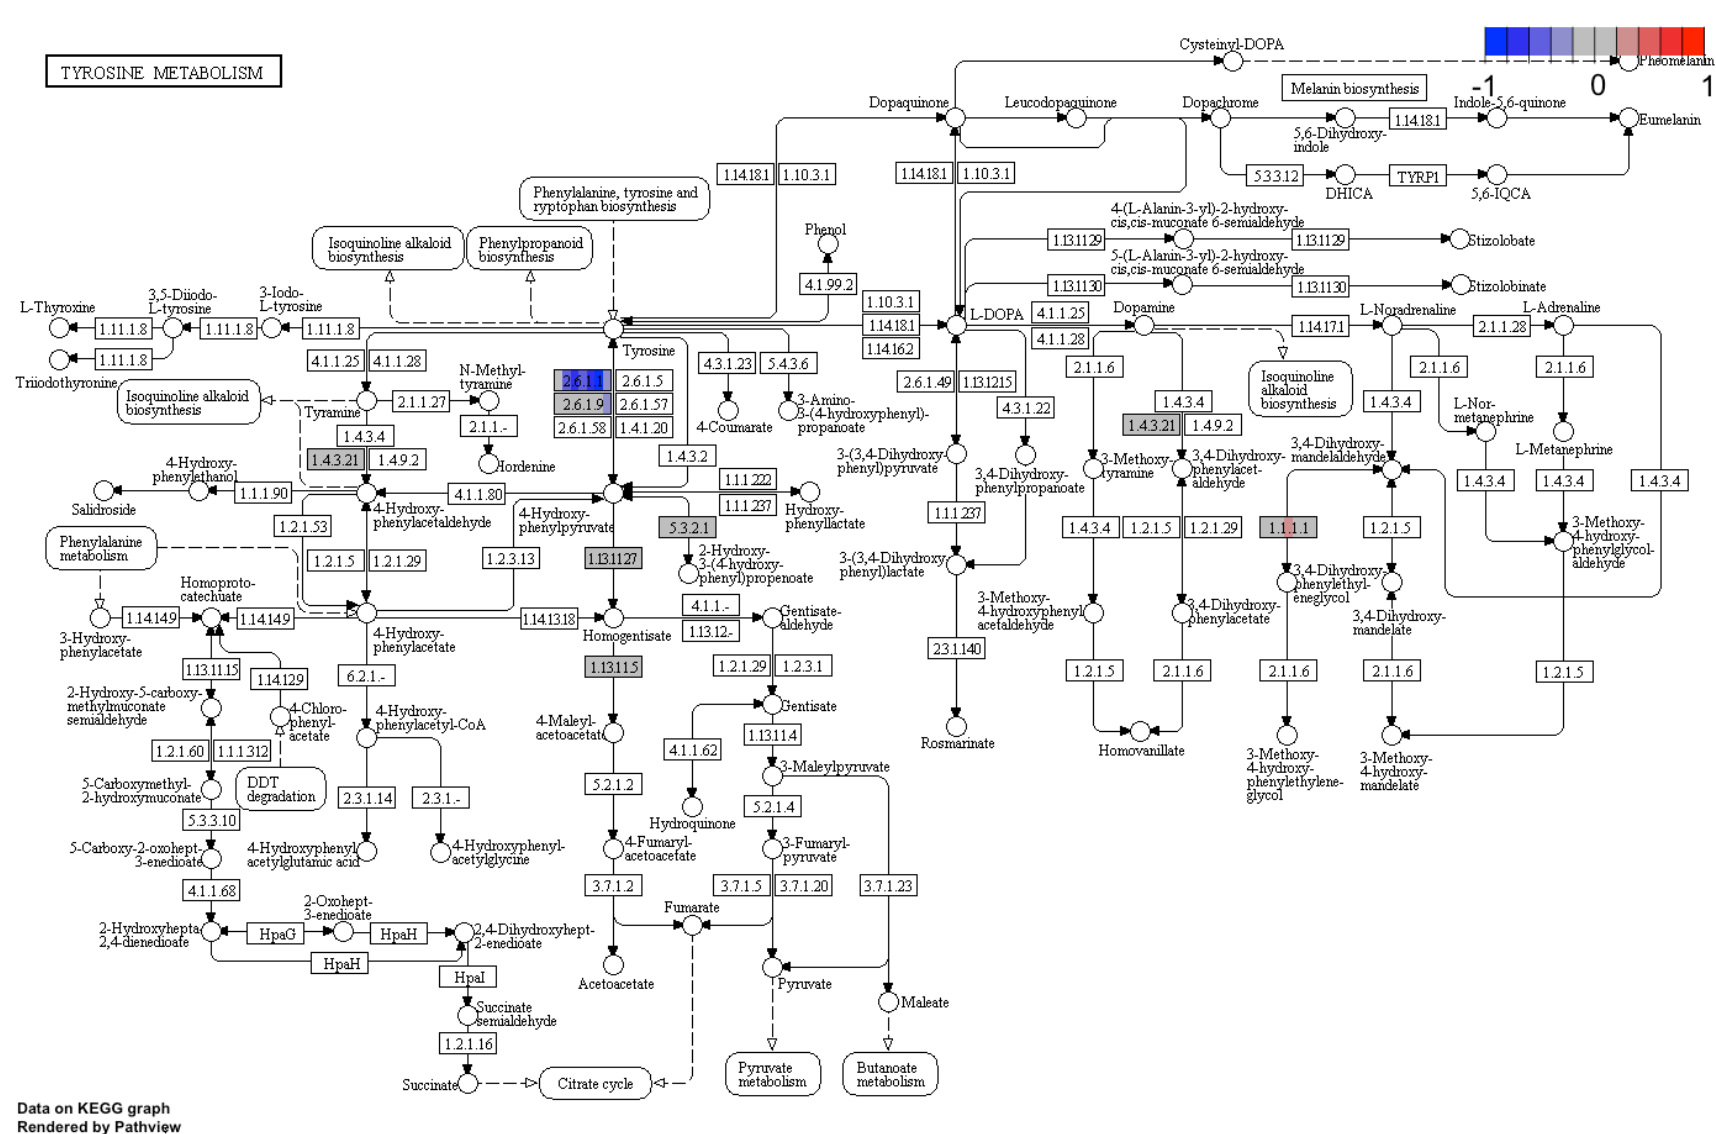

O)

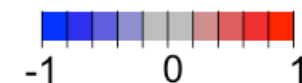

## HISTIDINE METABOLISM

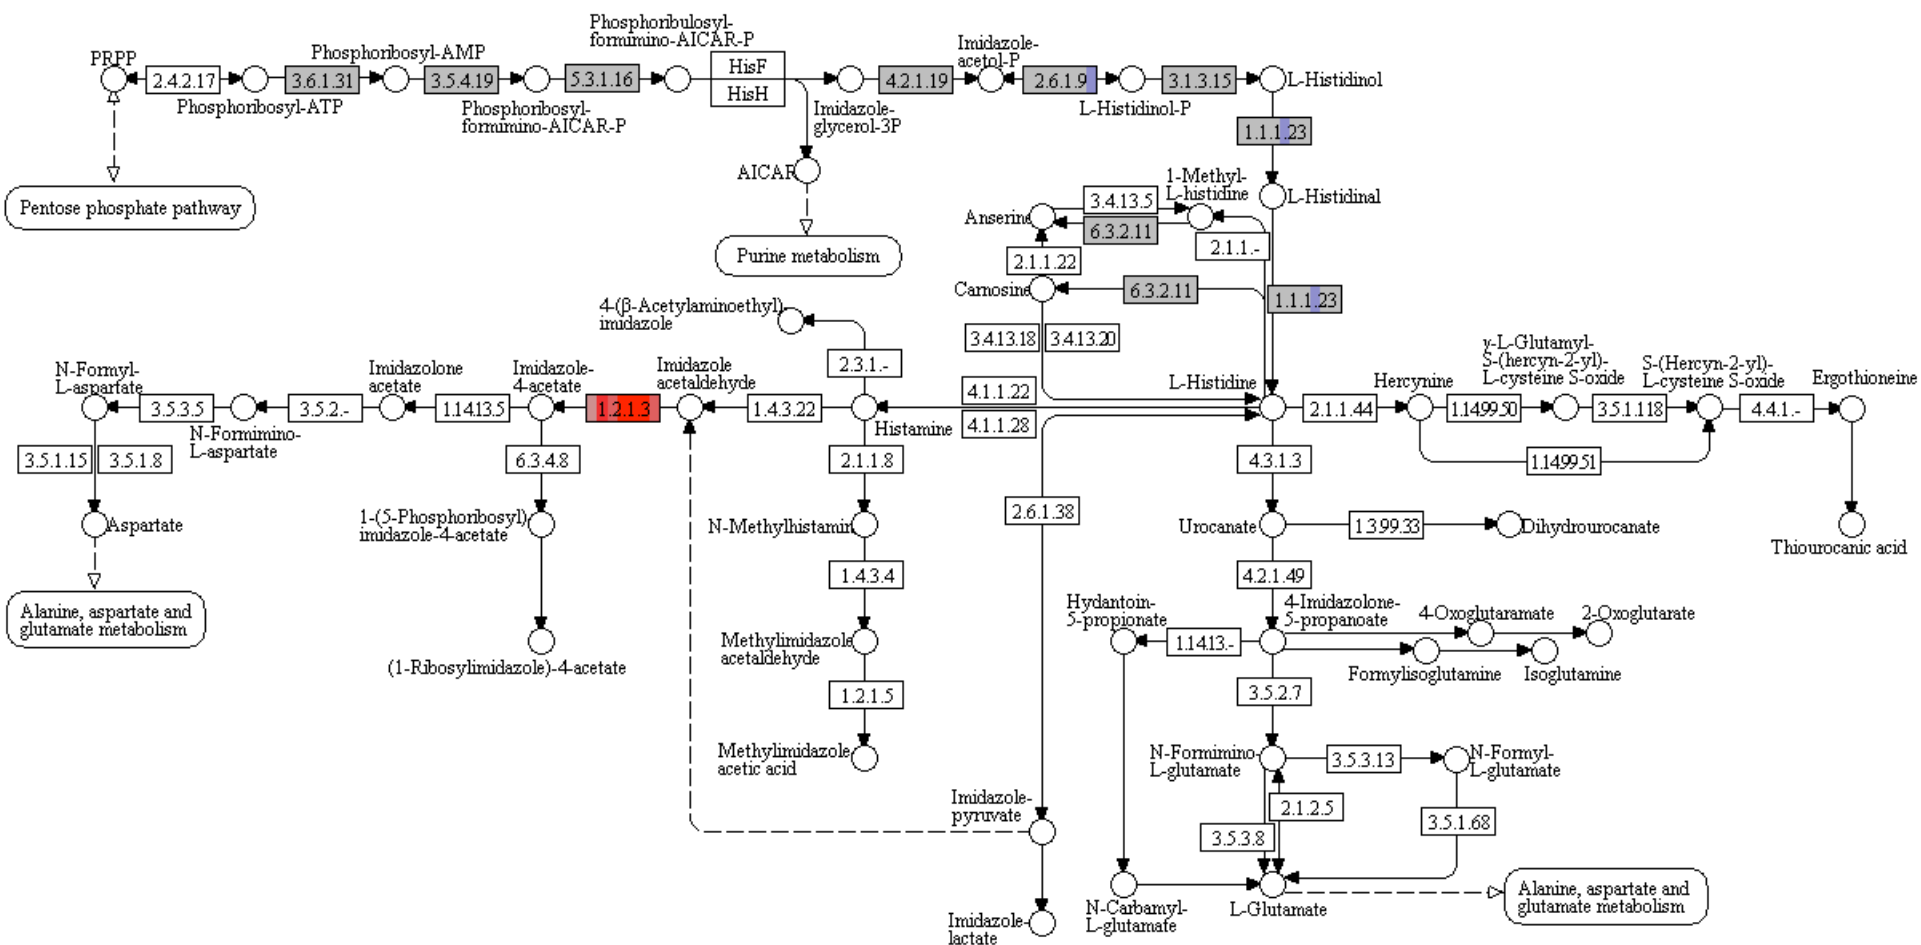

Data on KEGG graph  
Rendered by Pathview

**P'**

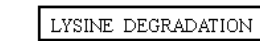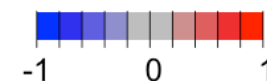

Data on KEGG graph  
Rendered by Pathview

Q)

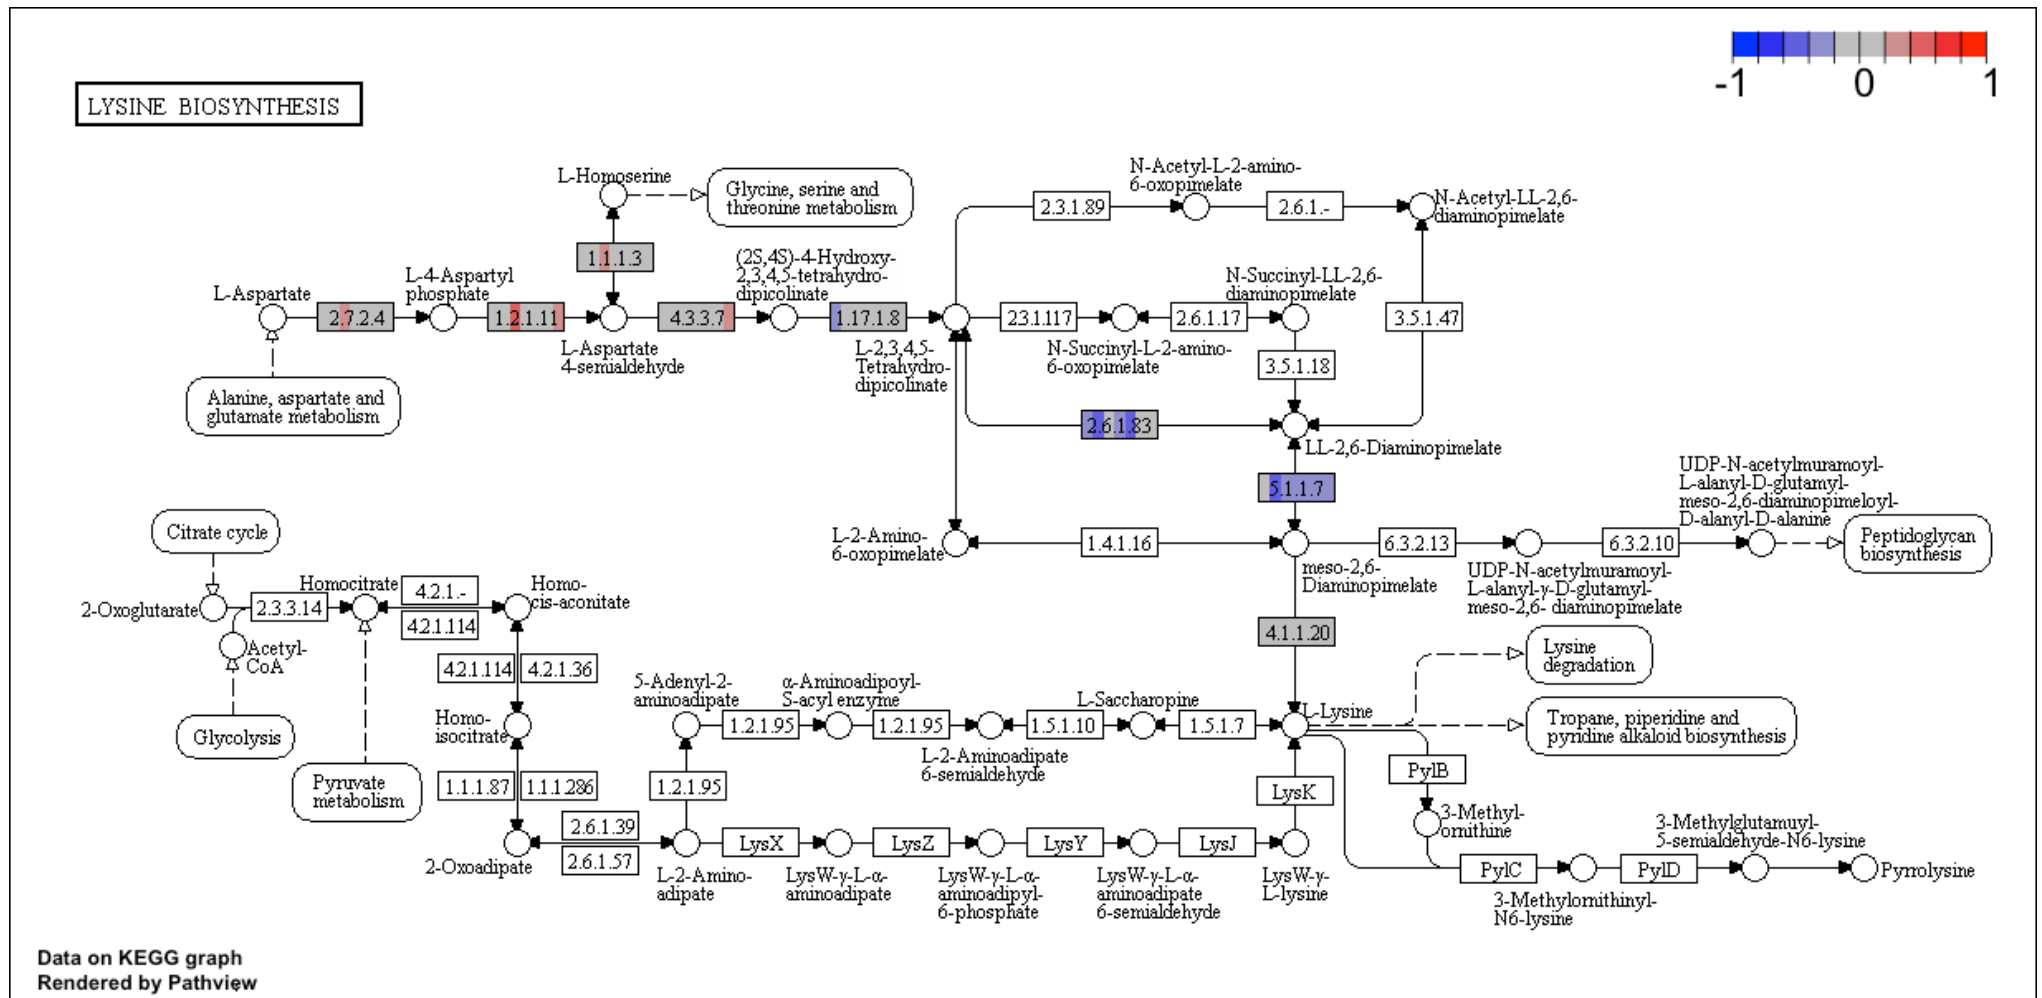

R)

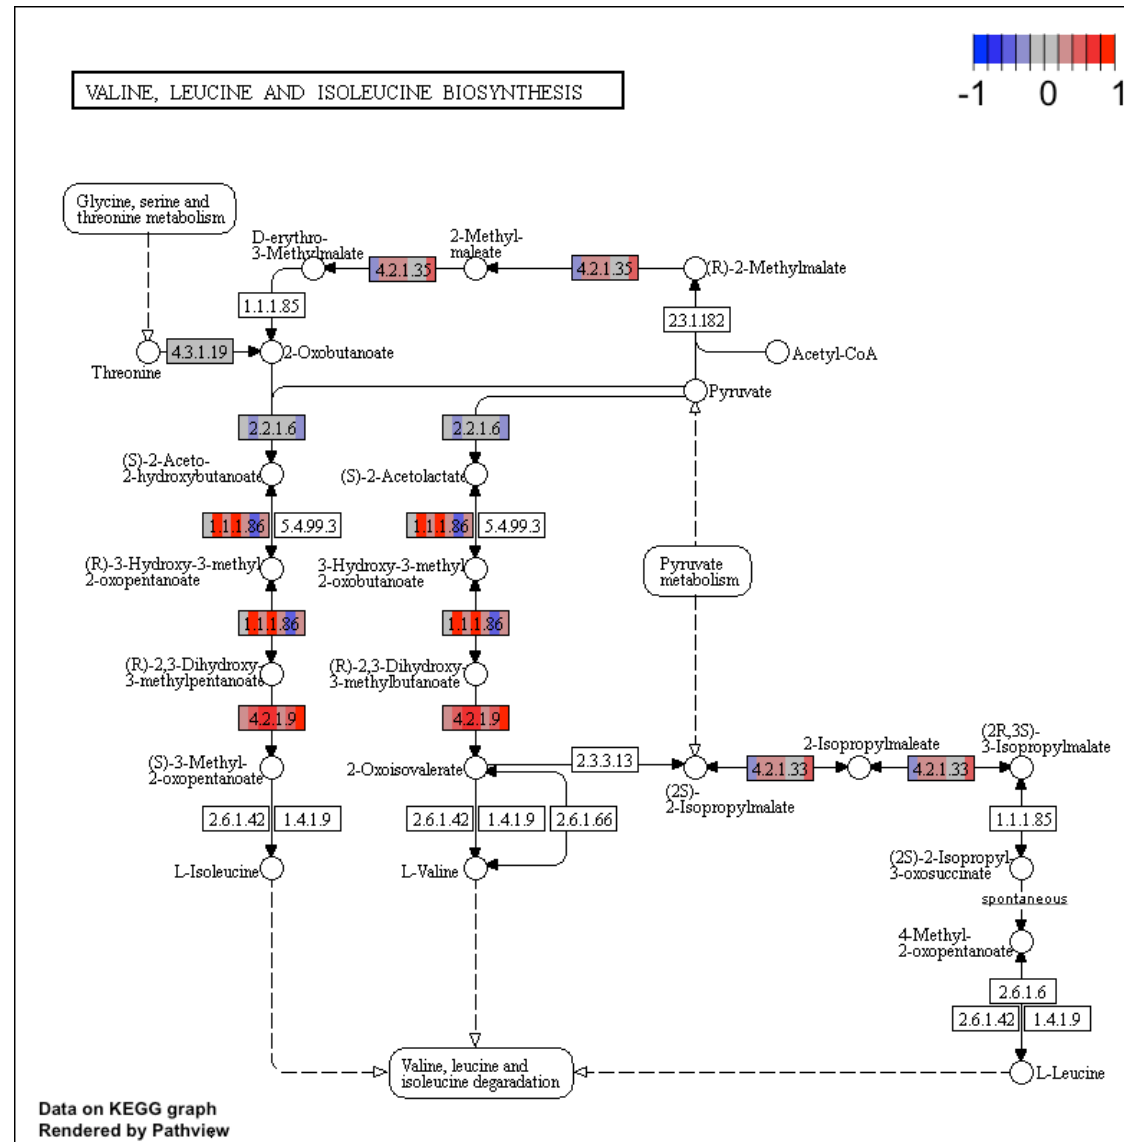

S)

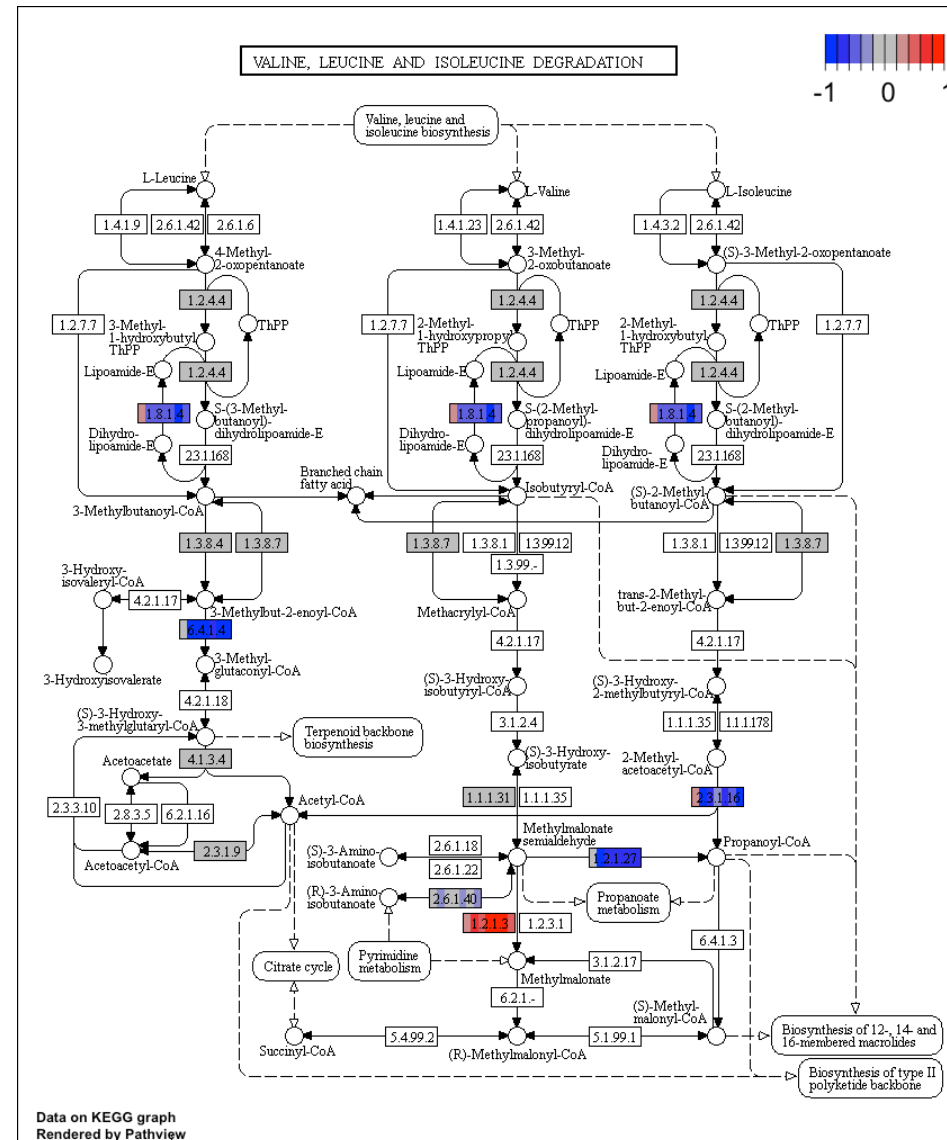

T)

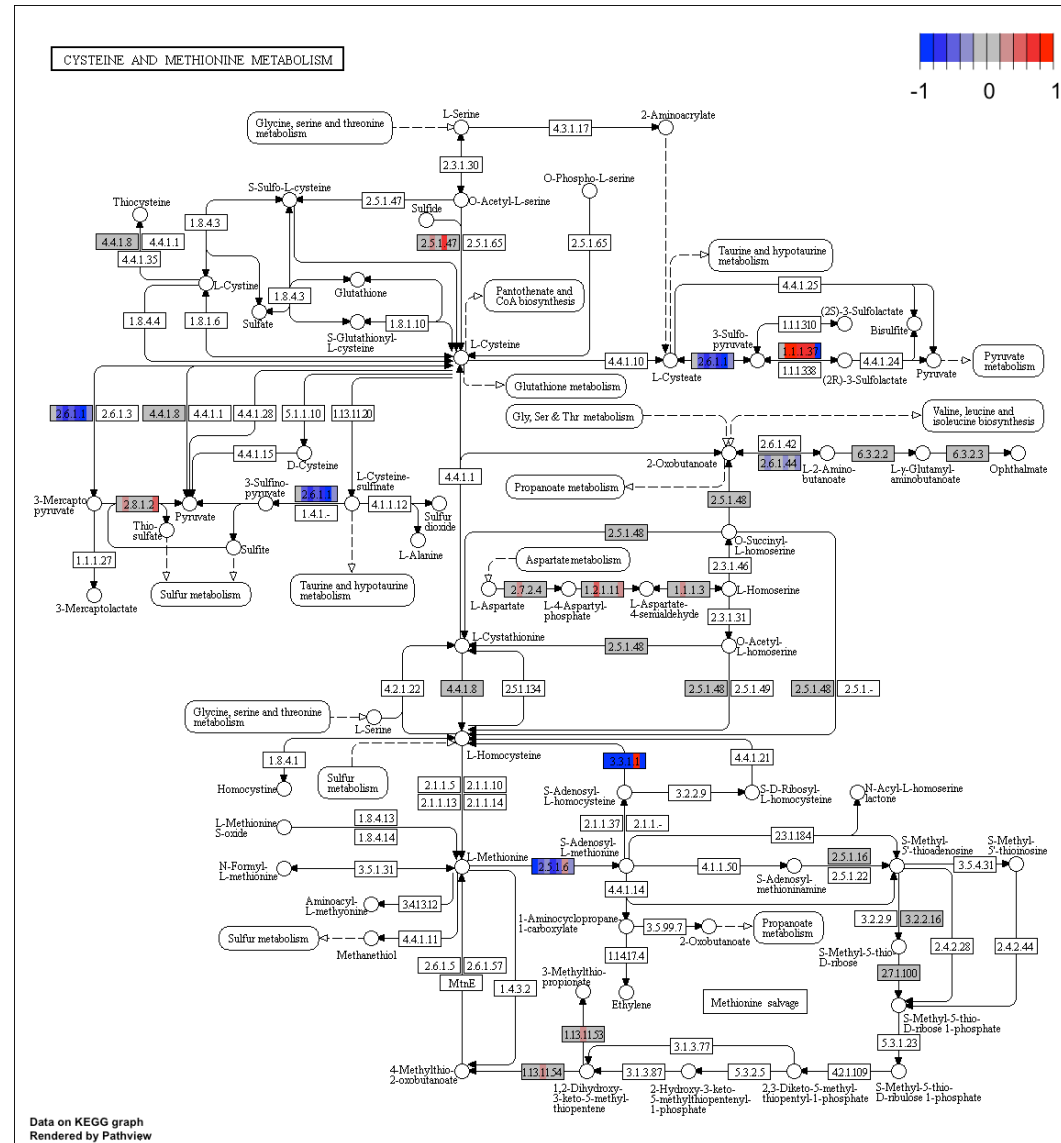

U)

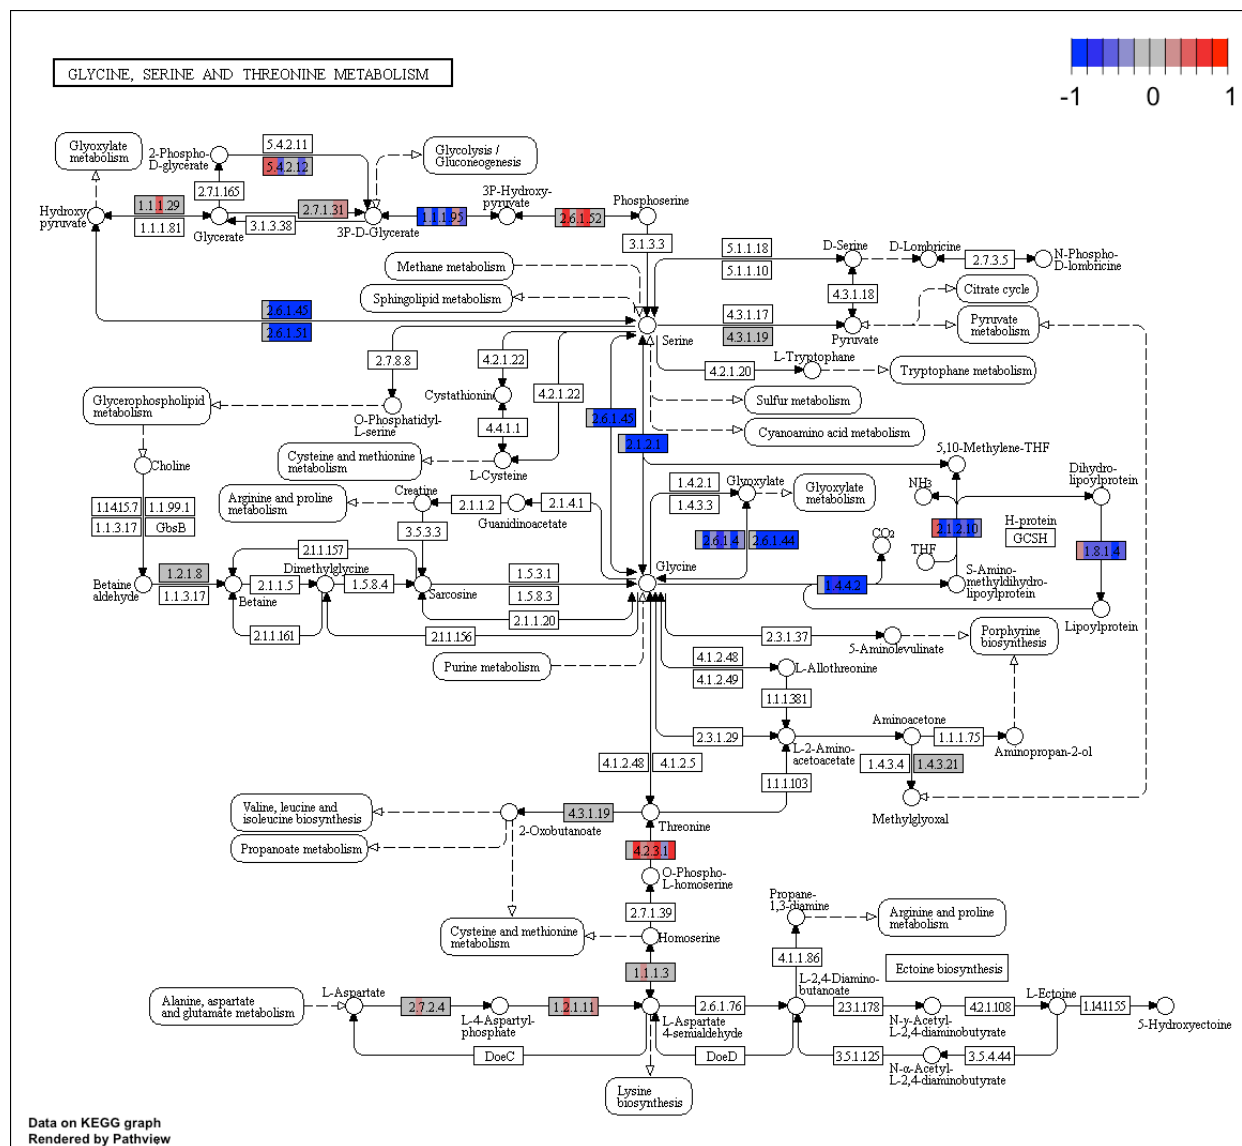

V)

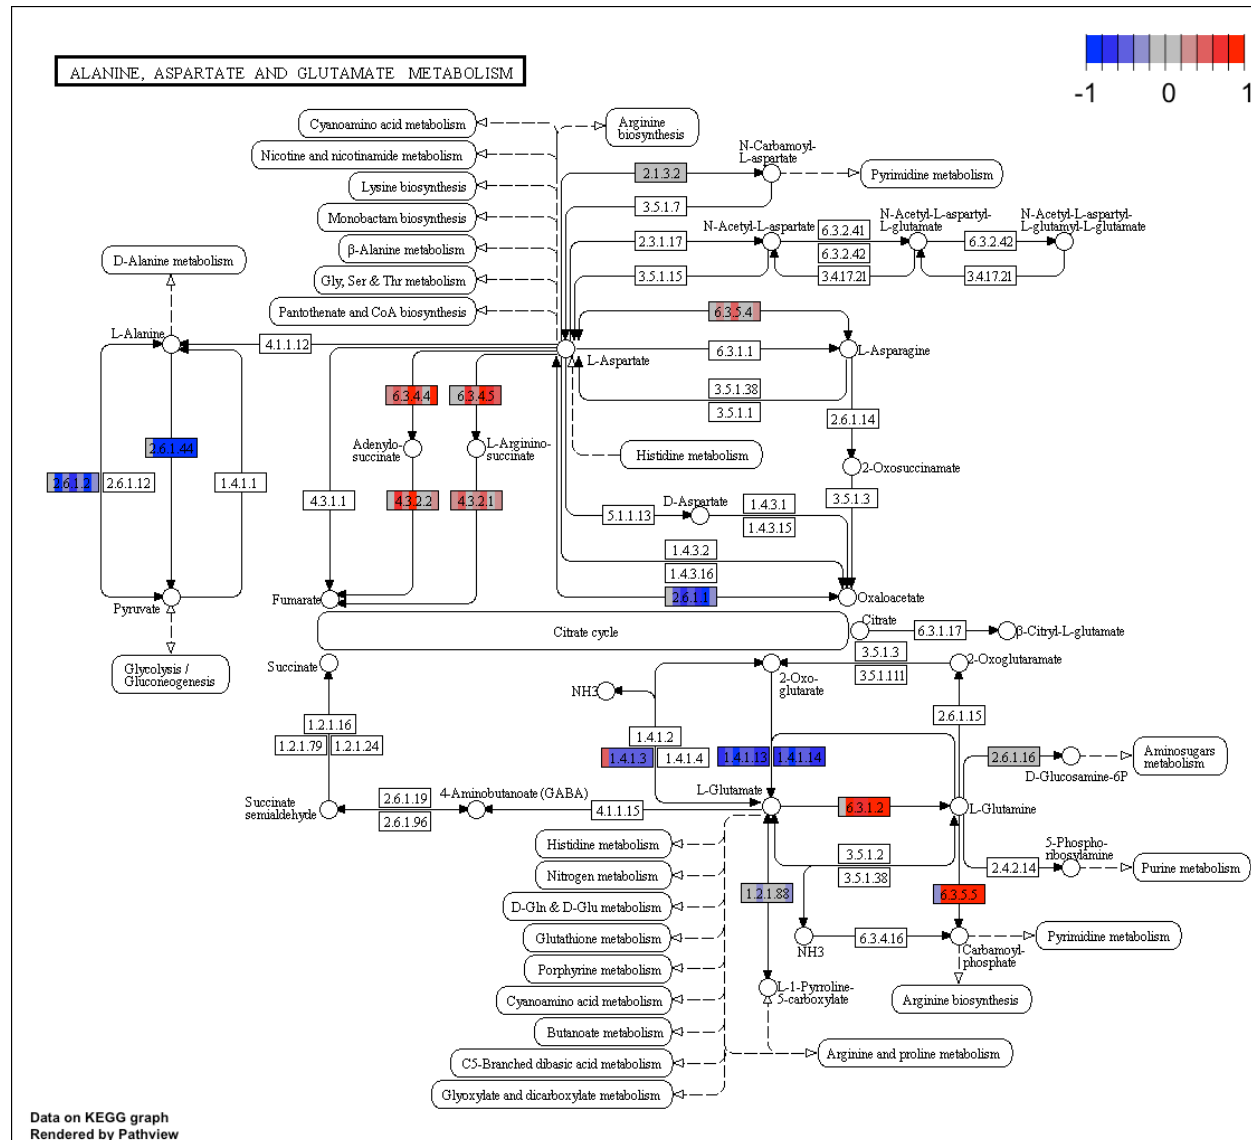

Supplement: Supplementary file 4 — Supplementary Data 1 [file 41467_2018_7106_MOESM4_ESM.pdf]
