# Supplementary material for: Proteome evolution under non-substitutable resource limitation
Source: PubMed Central journal article supplement (PMC6220234; doi:10.1038/s41467-018-07106-z), 2018-11-07
Supplement: 41467_2018_7106_MOESM3_ESM.pdf [file 41467_2018_7106_MOESM3_ESM.pdf]

## Description of Additional Supplementary Files

**File Name:** Supplementary Data 1

**Description:** Core metabolic pathways of *C. reinhardtii*. The blank circles represent metabolites and the square boxes enzymes, with blue indicating down-regulation and red up-regulation, and the embedded numbers corresponding to Enzyme Catalogue (EC) numbers. A-B) Photosynthetic machinery. C) Protein synthetic machinery. D-E) Fatty acid metabolism. F) Pyrimidine metabolism. G) Purine metabolism. H-V) Amino acid metabolism.
